# Supplementary material
Source: PubMed Central journal article supplement (PMC6944236)

**Supplementary Figure1.** Interface of Citrullia, showing each page from the program, where home page, analysis page, validation page, and quantification page can be picked from the left menu, while sub menus can be picked in the top of each page. From the analysis window, the following subpages can be accessed, general, parameters, modifications, and options. Furthermore, all the parameters from the X! Tandem search engine can be accessed by the analysis page. By selecting a peptide from the validation page, three windows can be opened, one for analysis of paired citrullinated peptides by the citrullinated peptide, one for analysis of the paired citrullinations by the arginine containing peptide, and one for single citrullinated peptides.

## Interface of Citrullia

The figure displays six screenshots of the Citrullia software interface, arranged in a 2x3 grid. Each screenshot shows a different page of the application, with a consistent layout featuring a left-hand navigation menu and a top navigation bar with sub-menus (General, Parameters, Modifications, Options, Run).

- Top-Left Screenshot (Home):** Shows the 'Welcome to Citrullia' page. It includes a 'Load' button for input files (.MGX) and a 'Start finding citrullinated peptides by loading .MGX' instruction. The SDU logo is visible at the bottom right.
- Top-Right Screenshot (Analysis):** Shows the 'Parameters' sub-menu. It includes a 'Digestion Enzyme' dropdown set to 'Trypsin (K/R)P', a 'Sequence File' dropdown set to 'Library\_Plasta', and an 'Input Files (.MGX)' list containing several files like 'QE-H1\_10223\_DNL\_mz0ML.MGX'.
- Middle-Left Screenshot (Analysis):** Shows the 'Parameters' sub-menu with various settings for 'Parent Mass Error', 'Spectrum', 'Ion Inclusion', 'Fragmentation Method', and 'Scoring'. The 'Fragmentation Method' is set to 'CID/CID' and 'ESD/ECD'.
- Middle-Right Screenshot (Analysis):** Shows the 'Modifications' sub-menu. It displays a table of 'Variable Modifications' with columns for Name, Retention, and Mass Change. The table includes entries like Oxidation (15.999), Deamidation (28.031), and Citrullination (0.984).
- Bottom-Left Screenshot (Analysis):** Shows the 'Options' sub-menu. It includes sections for 'General' (Noise Suppression, N-terminal acetylation, etc.) and 'Refinement' (Semi Cleavage, Unspecific Cleavage, etc.).
- Bottom-Right Screenshot (Quantification):** Shows the 'Quantification' sub-menu. It includes a 'Parent Mass Tolerance' dropdown set to '10 ppm', a 'Retention Time Interval' dropdown set to '5 min', and an 'Export Table' button. A table of results is visible, with columns for Protein, Sequence, DR-VC, Arg-VC, CIL %, and Lowlty.

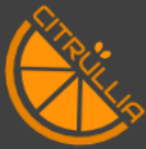

Home

Analysis

Validation

Quantification

Validation

Citrullinations

Arginines

Lonely

Search Query:

Subject Spectra

Type: Modified
Name: Citrullination
Residue: [R]
Mass Change: + 0.9845
(From an identical unmodified peptide)

Complimentary Spectra

Type: Unmodified
Name: Arginine Containing
Residue: [R]
Mass difference: - 0.9845
(From the subject spectra parent mass)

Parent Mass Error:

0.05 Da

Find Spectra

Search Result:

Table with 5 columns: Protein, ScanID, E-value, Scans, Sequence. Contains search results for various protein scans.

Spectra Validation - Citrullinations

Spectrum ID: 3282

Citrullinated Peptide:

ID / Protein: 3282 / B2RMC1
Parent Mass: 1497.689
Charge-state: 2
Sequence: GSHEPVADNSTVAGR
E-value: 1.4E-07
Retention Time: 727 sec.
File Name: QEHF1\_10226\_DNLmzXMLMGX

Arginine Peptide:

ID / Protein: 3173 / B2RMC1
Parent Mass: 1496.706
Charge-state: 3
Sequence: GSHEPVADNSTVAGR
E-value: 1.5E-06
Retention Time: 711 sec.
File Name: QEHF1\_10236\_DNLmzXMLMGX

Next
Previous
Add
Remove

Export

Table with 8 columns: a, b-18, b-17, b, Seq., y, y-17, y-18. Lists mass values and sequence fragments.

Table with 8 columns: a, b-18, b-17, b, Seq., y, y-17, y-18. Lists mass values and sequence fragments.

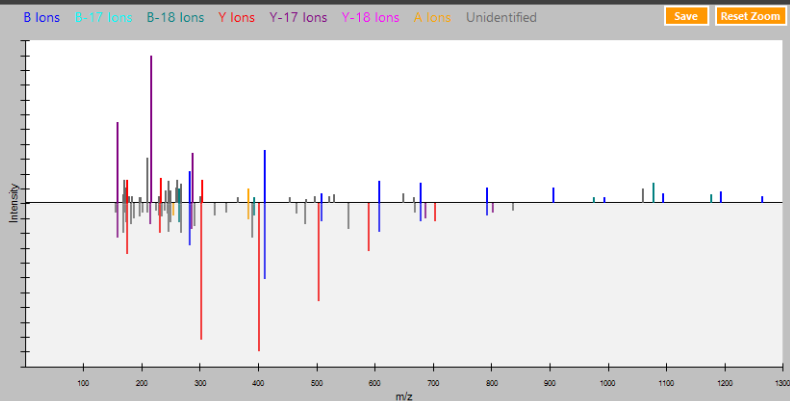

MS1 Scan of Modified Peptide
Retention Time: 726 sec.

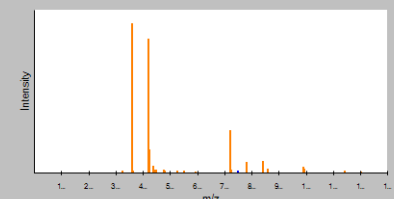

MS1 Scan of Unmodified Peptide
Retention Time: 710 sec.

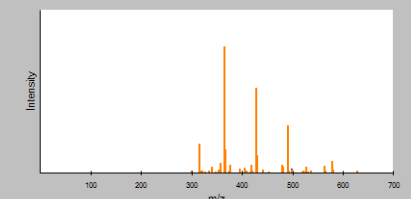

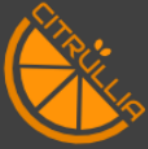

Home

Analysis

Validation

Quantification

Validation

Citrullinations

Arginines

Lonely

Search Query:

Subject Spectra

Type: Unmodified
Name: Arginine Containing
Residue: [R]
Mass Change: 0.0
(From an identical unmodified peptide)

Complimentary Spectra

Type: Modified
Name: Citrullination
Residue: [R]
Mass difference: + 0.9845
(From the subject spectra parent mass)

Parent Mass Error:

0.05 Da

Find Spectra

Search Result:

Table with columns: Protein, ScanID, E-value, Scans, Sequence. Contains search results for various protein entries.

Spectra Validation - Arginines

Spectrum ID: 5241

Arginine Peptide:

ID / Protein: 5241 / B2RM93
Parent Mass: 2410.136
Charge-state: 3
Sequence: SDQVYGVQVGNHDHYNEVFIGR
E-value: 4.7E-10
Retention Time: 1177 sec.
File Name: QEHF1\_10121\_DNLmzXMLMGX

Citrullinated Peptide:

ID / Protein: 5508 / B2RM93
Parent Mass: 2411.131
Charge-state: 3
Sequence: (SDQVYGVQVGNHDHYNEVFIGR)
Retention Time: 1235 sec.
File Name: QEHF1\_10127\_DNLmzXMLMGX
(NB. The Sequence is in this case the potential sequence!)

Next
Previous
Add
Remove

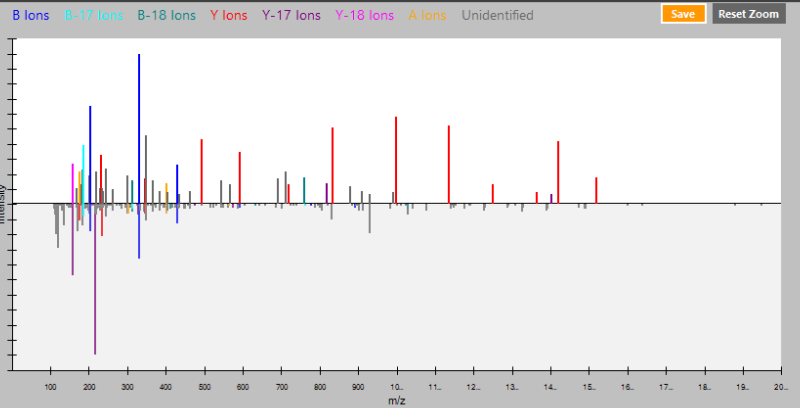

Table with columns: a, b-18, b-17, b, Seq, y, y-17, y-18. Contains mass spectrometry data points.

Table with columns: a, b-18, b-17, b, Seq, y, y-17, y-18. Contains mass spectrometry data points.

MS1 Scan of Unmodified Peptide
Retention Time: 1176 sec.

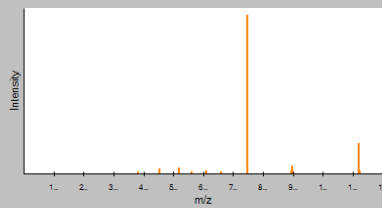

MS1 Scan of Modified Peptide
Retention Time: 1235 sec.

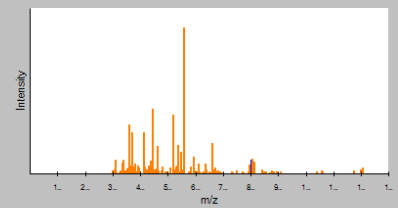

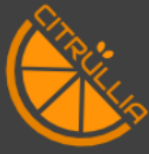

Home

Analysis

Validation

Quantification

Validation

Citrullinations

Arginines

Lonely

Search Query:

Subject Spectra

Type: Modified
Name: Citrullination
Residue: [R]
Mass Change: + 0.9845
(From an identical unmodified peptide)

Find Spectra

Search Result:

Table with columns: Protein, ScanID, E-value, Scans, Sequence. Contains search results for various peptides like tr|B2RKG5|B2RKG5\_P... and sp|B2RM93|CPG1\_PO...

Spectra Validation - Lonely Citrullinations

Spectrum ID: 2847

Citrullinated Peptide:

Parent Mass: 642.391
Charge-state: 2
Sequence: AGRIPK
E-value: 0.00085
Retention Time: 639 sec.
File Name: QEHF1\_10237\_DNLmzXMLMGX

Add

Remove

Export

Table with columns: a, b-18, b-17, b, Seq., y, y-17, y-18. Lists fragmentation data for the peptide.

B ions B-17 ions B-18 ions Y ions Y-17 ions Y-18 ions A ions Unidentified Save Reset Zoom

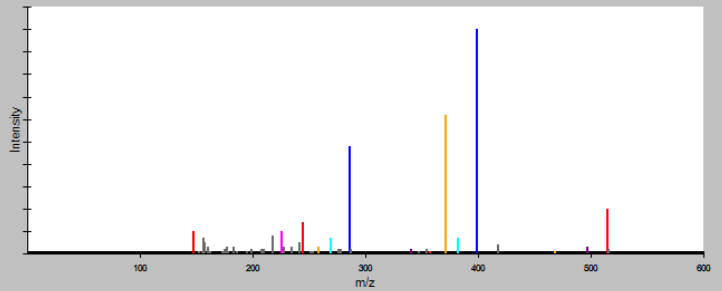

MS1 Scan of Modified Peptide
Retention Time: 638 sec.

Save Reset Zoom

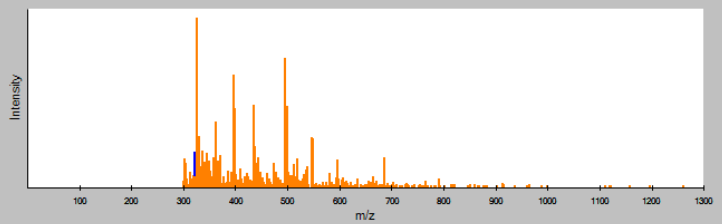

Supplement: 154766_2_supp_427803_q0wm5x.pdf [file 154766_2_supp_427803_q0wm5x.pdf]
