# Supplementary material
Source: PubMed Central journal article supplement (PMC6944236)

**Supplementary Figure 4.1.** *MS spectra showing the only three identified internally citrullinated peptides along with e-value. The three peptides identified with an internal citrullination are LDREGQD, IRIIQPIIR, and AGRIPK. All the identified internal citrullinations have been manually validated as outlined in Results. Significant e-values (<0.01) were obtained and key fragment ions observed. The third peptide (AGRIPK) was the only citrullinated peptide observed in the C351A strain.*

# Internal Citrullinations

E-value = 0.0024

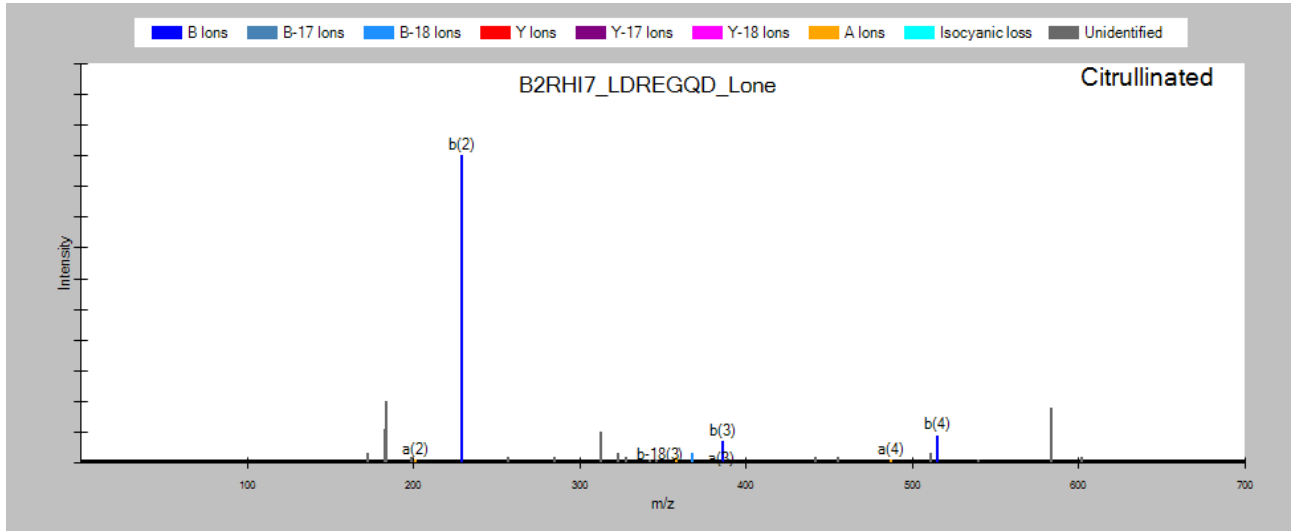

E-value = 0.0052

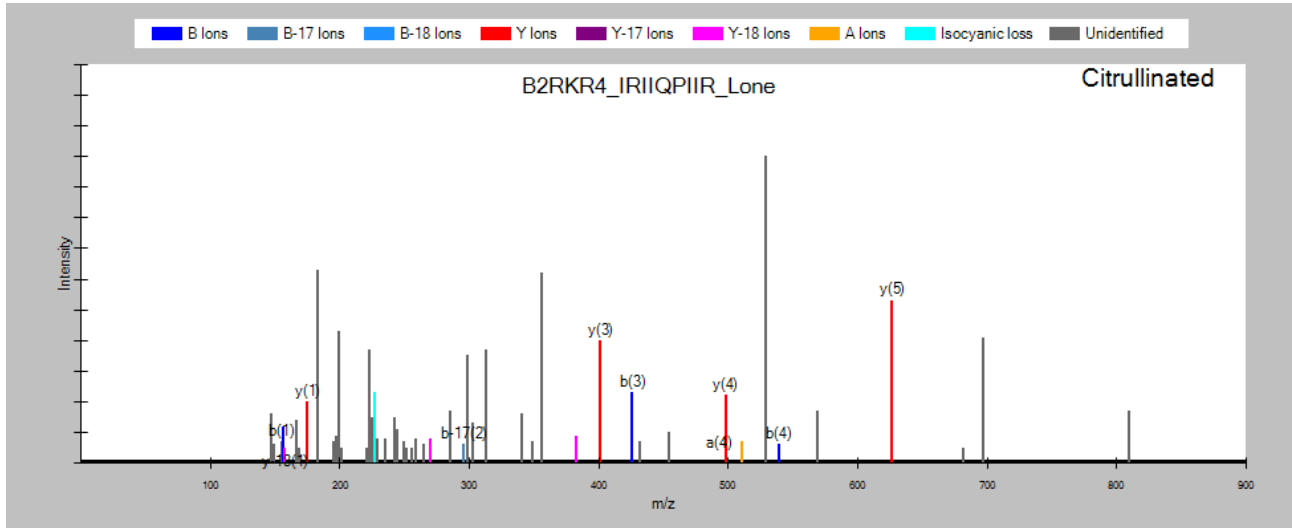

E-value = 0.00085

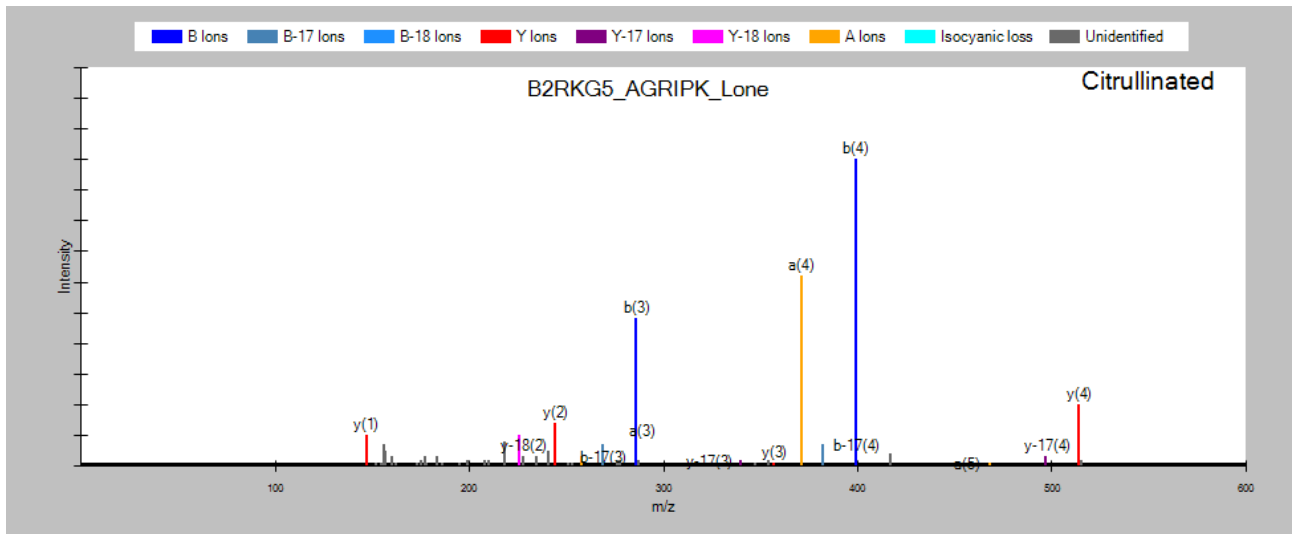

Supplement: 154766_2_supp_427798_q0qmdf.pdf [file 154766_2_supp_427798_q0qmdf.pdf]
