# Supplementary material
Source: PubMed Central journal article supplement (PMC6944236)

**Supplementary Figure 6.** *Sequence logo of the C-terminal citrullinated peptides observed in the triplicate two-dimensional separation based on a multiple alignment of the C-terminal five residues. The full logo is shown in Figure A while a zoomed logo is shown in B. The logo was produced using <https://weblogo.berkeley.edu/>.*

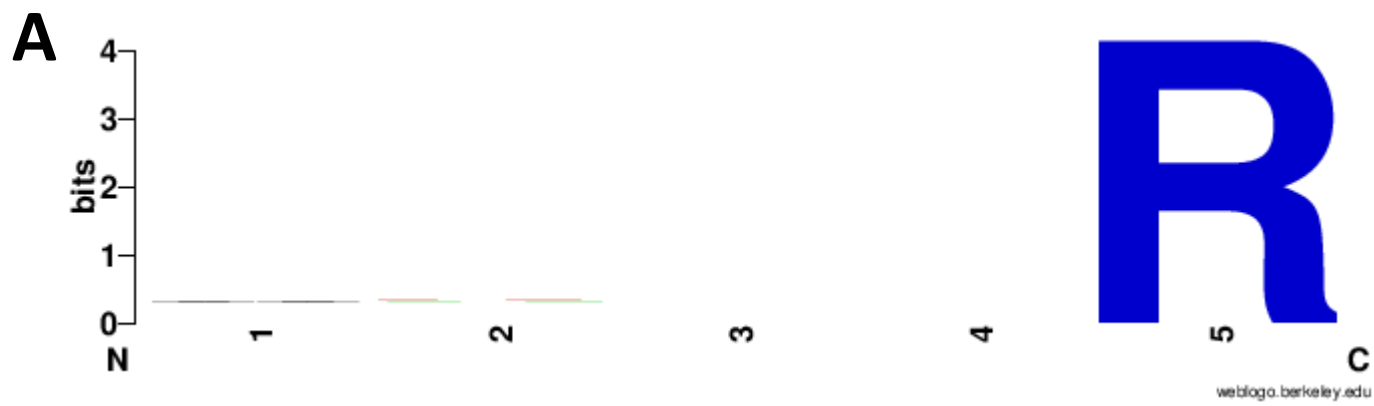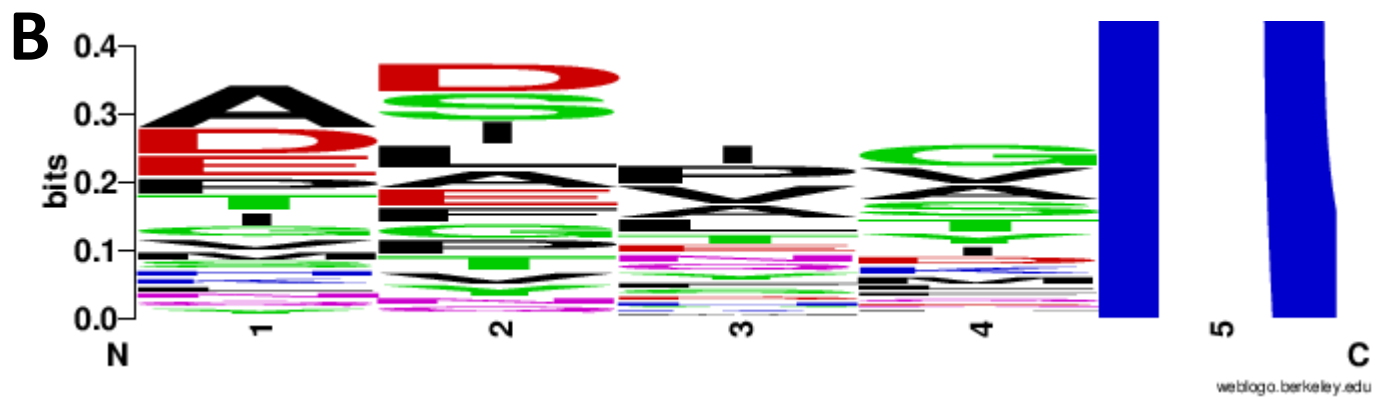

Supplement: 154766_2_supp_427801_q01m5x.pdf [file 154766_2_supp_427801_q01m5x.pdf]
