# Supplementary material
Source: PubMed Central journal article supplement (PMC6944236)

**Supplementary Figure 2.A-2.E. Two-dimensional separation of tryptic digests of *P. gingivalis* OMV isolate.**

Left: Second-dimension total ion count traces of the 30 fractions resulting from the first dimension HFBA fractionation. The first set of fractions was obtained from 5 to 10 min elution time. From 10 to 38 minutes fractions were collected in 1 min intervals. The last set was collected from 38 to 43 minutes elution time. Each fraction is shown from 10 to 30 min elution. Right: First dimension UV trace (214nm) of HFBA/acetonitrile separation for the following samples: 2.2 = 100  $\mu$ g of WT *P. gingivalis* OMV, 2.3 = 100  $\mu$ g of C351A *P. gingivalis* OMV, 2.4 = 100  $\mu$ g of C351A *P. gingivalis* OMV, 2.5 = 100  $\mu$ g of  $\Delta$ PPAD *P. gingivalis* OMV, and 2.6 = 100  $\mu$ g of  $\Delta$ PPAD *P. gingivalis* OMV.

2.A WT\_3

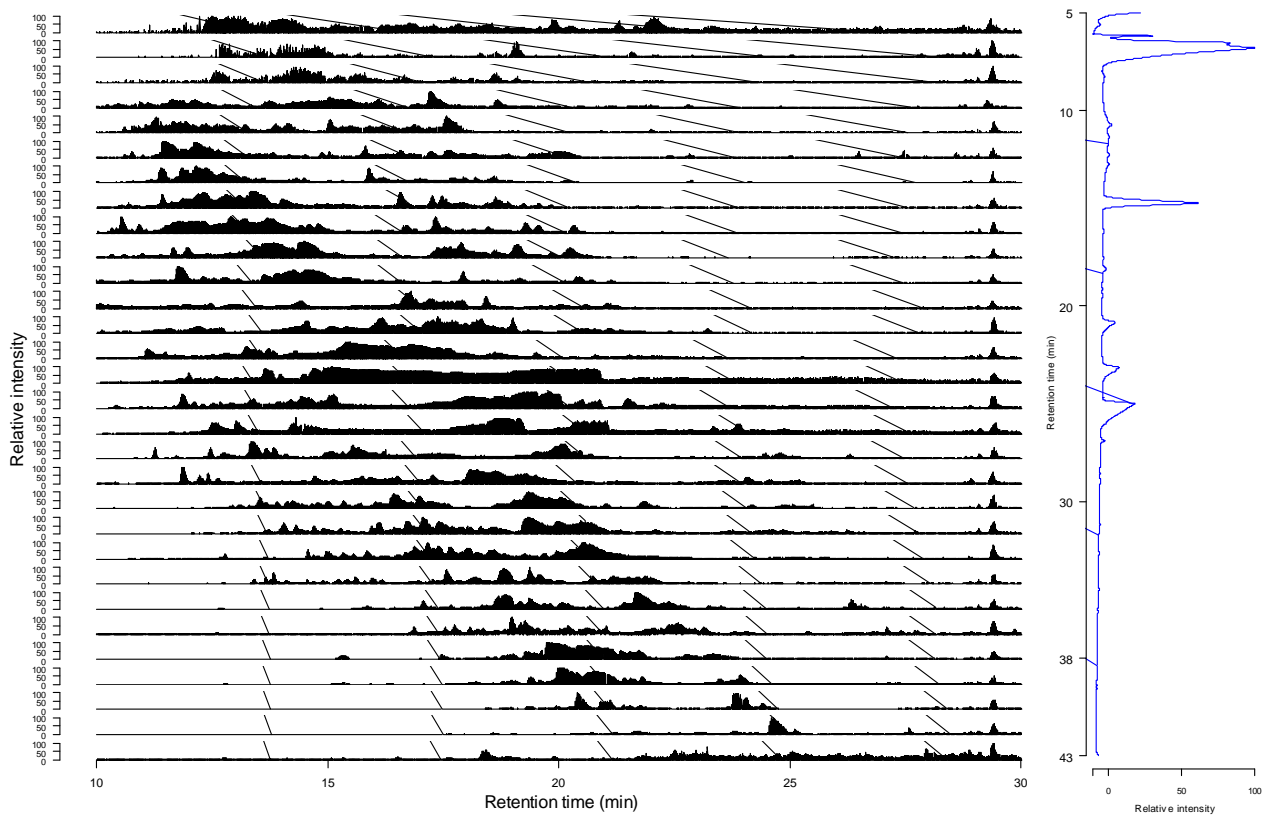

## 2.B C351A\_2

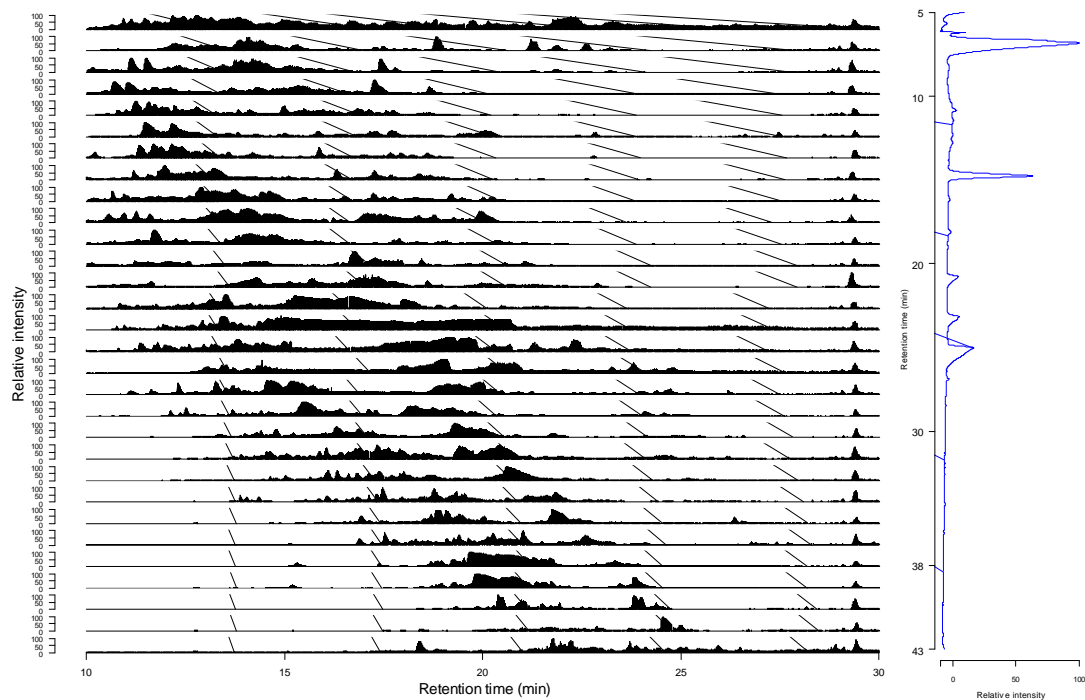

## 2.C C351A\_3

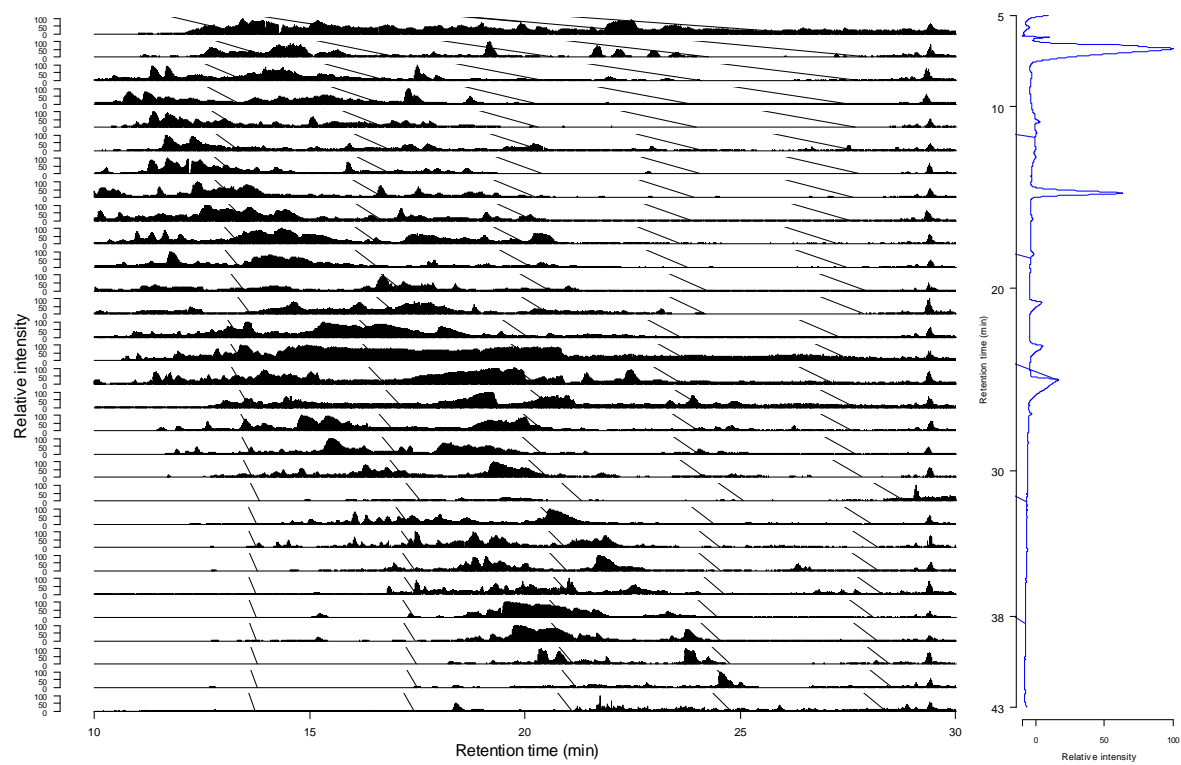

## 2.D ΔPPAD\_1

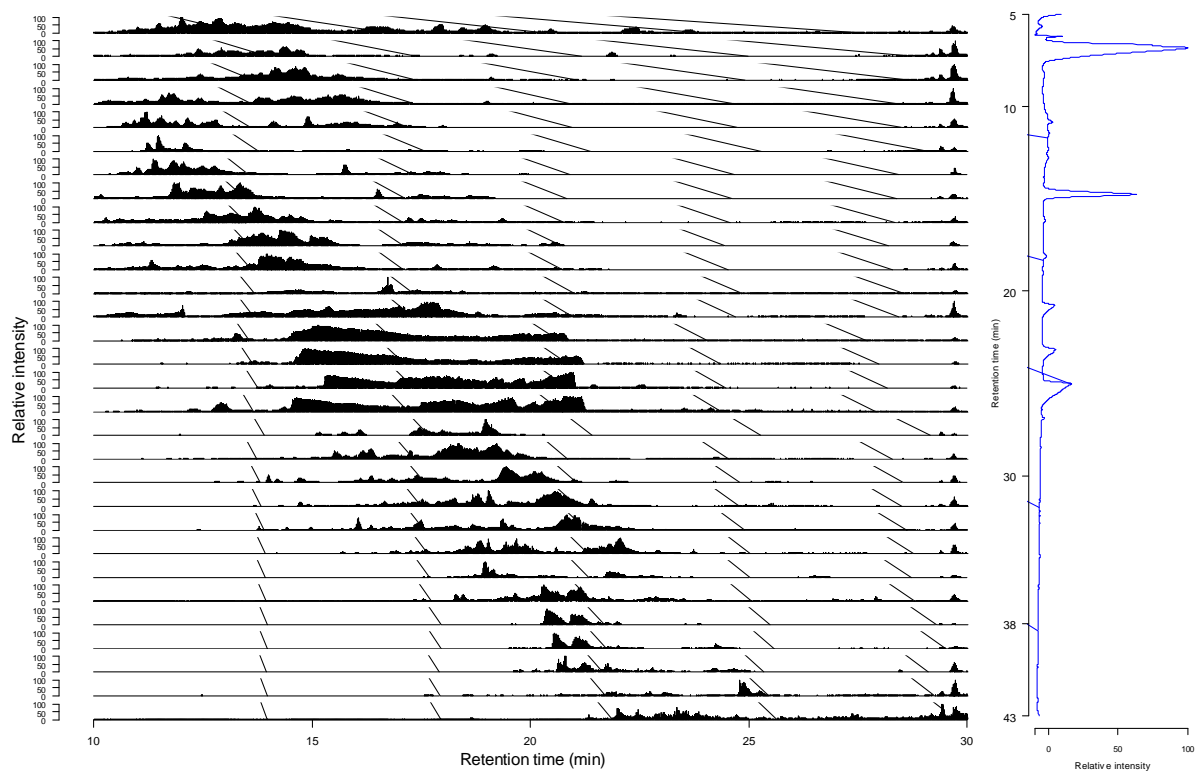

## 2.E ΔPPAD\_2

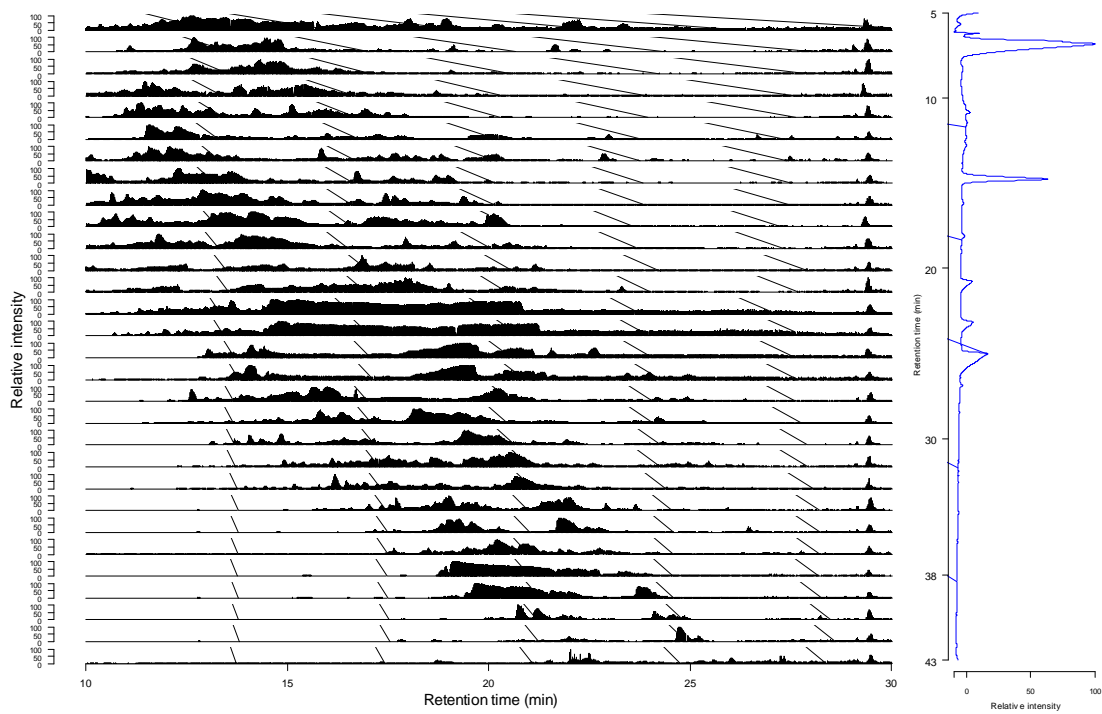

Supplement: 154766_2_supp_427802_q05m5x.pdf [file 154766_2_supp_427802_q05m5x.pdf]
